# Supplementary material for: Essential gene prediction in Drosophila melanogaster using machine learning approaches based on sequence and functional features
Source: PubMed Central journal article supplement — Comput Struct Biotechnol J. 2020 Mar 10;18:612–21. doi: 10.1016/j.csbj.2020.02.022 (PMC7096750; doi:10.1016/j.csbj.2020.02.022), 2020-03-10
Supplement: mmc1.pdf [file mmc1.pdf]

Essential

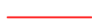

Non-Essential

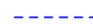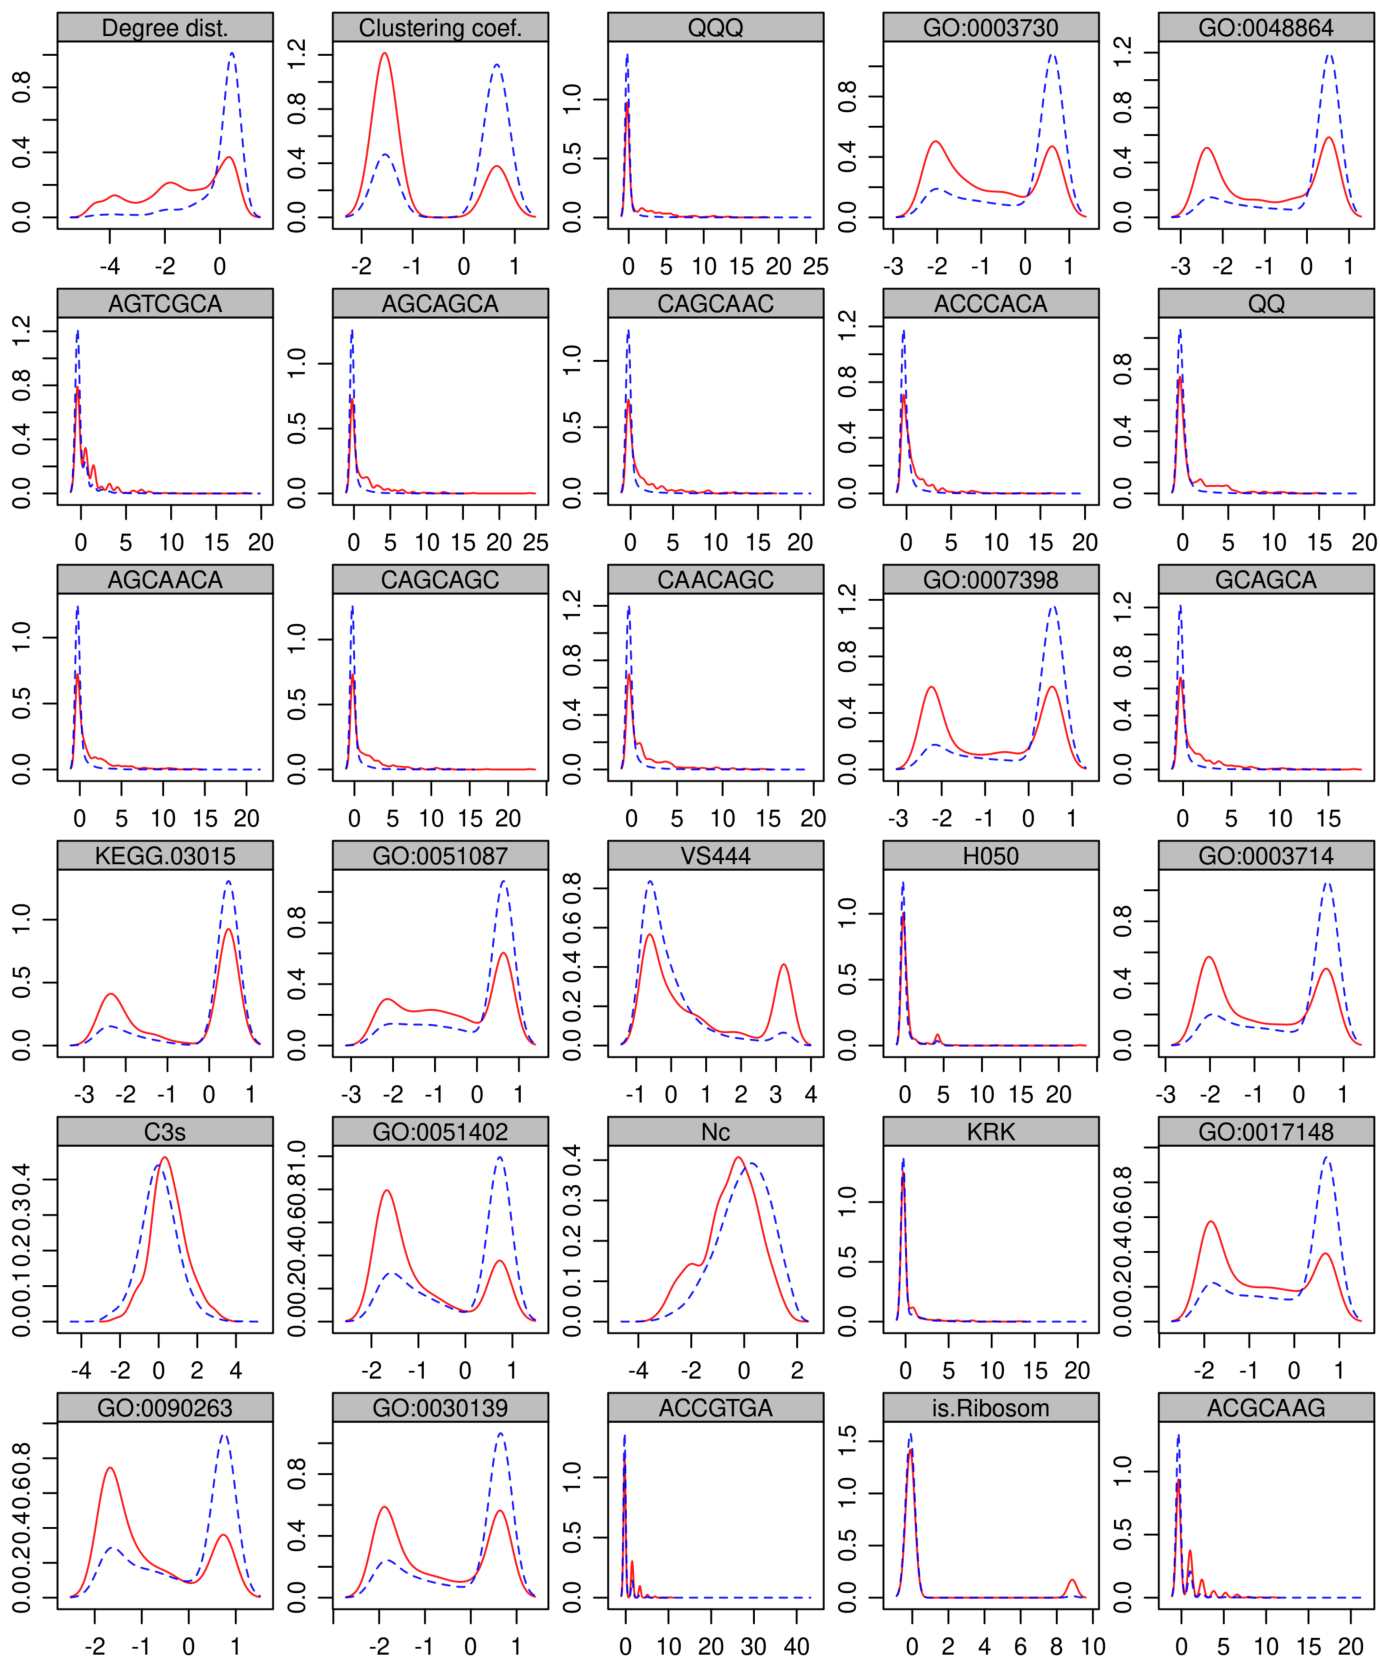

**Supplementary Figure 1:** Density distributions of the z-scores in the 30 most important features.
